# Supplementary material for: Excited state localisation cascades in inorganic semiconductor nanoparticles
Source: Royal Society of Chemistry journal article supplement (doi:10.1039/c3cp50800e), 2013-01-01
Supplement: c3cp50800e.pdf [file c3cp50800e.pdf]

Electronic Supplementary Information for:

## Excited state localisation cascades in inorganic semiconductor nanoparticles

Martijn A. Zwijnenburg

Department of Chemistry, University College London, 20 Gordon Street, WC1H 0AJ,  
UK. Email address: [m.zwijnenburg@ucl.ac.uk](mailto:m.zwijnenburg@ucl.ac.uk).

### ESI-1 Typical ground and excited state charge differences for the different excited state minima

For the *N-II* minima we typically find two sulphur atoms with a  $S_1$ - $S_0$  NBO charge difference of  $\sim +0.3$  each (i.e. both atom has 0.3 units of electrons less in the excited state compared to the ground state at the same geometry). There is also typically a number of zinc atoms with a  $S_1$ - $S_0$  NBO charge difference of  $\sim -0.03$  -  $-0.06$  each (i.e. both atom has 0.03-0.06 units of electrons more in the excited state compared to the ground state at the same geometry). There might also be occasionally a small number of nitrogen atoms with a similar magnitude and sign  $S_1$ - $S_0$  NBO charge difference. For the *I-II* minima we typically find two sulphur atoms with a  $S_1$ - $S_0$  NBO charge difference of  $\sim +0.2$  each and one zinc atom with a  $S_1$ - $S_0$  NBO charge difference of  $\sim -0.4$ . There is more inherent variation for the *I-I minima/CX*. Typically we find a relatively large positive  $S_1$ - $S_0$  NBO charge difference on the 2-coordinated sulfur atom ( $\sim +0.4$  for the  $T_1$  minima and  $\sim +0.8$  -  $+1.0$  for the  $S_1$  CXs) and a relatively large negative  $S_1$ - $S_0$  NBO charge difference on the 2-coordinated zinc atom ( $\sim -0.4$  for the  $T_1$  minima and  $\sim -0.7$  -  $-0.8$  for the  $S_1$  CXs). Other atoms in the direct neighbourhood can also have, however, in this case a significant  $S_1$ - $S_0$  NBO charge difference, especially for the CXs. In these cases the  $S_1$ - $S_0$  NBO charge difference are typically the opposite of what normally finds for the particular type of atom (i.e. zinc atoms having less electrons in the excited state than the ground state or sulfur atoms having more) and the maximum magnitude is less than half that found for the 2-coordinated atoms.

### ESI-2 PLE and ESSE values for *N-II* and *I-II* minima

Tables ST-1 and ST-2 summarise the PLE and Excited State Stabilisation Energy (ESSE, the difference in excited state energy between the ground state minimum energy geometry and the geometry in question) for the most energetically stable (i.e. lowest energy) version found of the *N-II* and *I-II* minima on the  $S_1$  and  $T_1$  energy landscape of each particle. Most data is taken from table 1 of my previous paper (data marked by an asterisk)<sup>1</sup>. In some cases a slightly more stable version of a type of minimum previously reported in reference 1 was found and then data for this new more stable minimum is included in table ST-1 and ST-2 rather than the original one. Table ST-1 also includes never before published data for the *I-II*  $S_1$  minima of  $Zn_{22}S_{22}$  and  $Zn_{26}S_{26}$ .

**Table ST-1** PLE and ESSE values for *N-II* and *I-II* S<sub>1</sub> minima

| S <sub>1</sub>                   | <i>N-II</i>       |                   | <i>I-II</i>       |                   |
|----------------------------------|-------------------|-------------------|-------------------|-------------------|
|                                  | PLE               | ESSE              | PLE               | ESSE              |
| Zn <sub>12</sub> S <sub>12</sub> | --                | --                | 0.98 <sup>*</sup> | 0.76 <sup>*</sup> |
| Zn <sub>16</sub> S <sub>16</sub> | --                | --                | 0.96 <sup>*</sup> | 0.81 <sup>*</sup> |
| Zn <sub>22</sub> S <sub>22</sub> | 2.55 <sup>*</sup> | 0.44 <sup>*</sup> | 0.85              | 0.80              |
| Zn <sub>26</sub> S <sub>26</sub> | 2.61 <sup>*</sup> | 0.51 <sup>*</sup> | 0.92              | 0.80              |

**Table ST-2** PLE and ESSE values for *N-II* and *I-II* S<sub>1</sub> minima

| T <sub>1</sub>                   | <i>I-II</i>       |                   |        |
|----------------------------------|-------------------|-------------------|--------|
|                                  | PLE               | ESSE              | ESSE-S |
| Zn <sub>12</sub> S <sub>12</sub> | 0.91 <sup>*</sup> | 0.86 <sup>*</sup> | 0.93   |
| Zn <sub>16</sub> S <sub>16</sub> | 0.86 <sup>*</sup> | 0.92 <sup>*</sup> | 0.99   |
| Zn <sub>22</sub> S <sub>22</sub> | 0.77 <sup>*</sup> | 0.91 <sup>*</sup> | 0.97   |
| Zn <sub>26</sub> S <sub>26</sub> | 0.82 <sup>*</sup> | 0.92 <sup>*</sup> | 0.98   |

**ESI-3 Example 10 K Born-Openheimer molecular dynamics run**

Fig. S-1 and S-2 below display an example of a 10 K Born-Openheimer molecular dynamics run on the S<sub>1</sub> energy landscape of the Zn<sub>12</sub>S<sub>12</sub> nanoparticle. Fig. S-1 plots the S<sub>0</sub> and S<sub>1</sub> energies as a function of the simulation progress while Fig. S-2 plots the S<sub>1</sub>-S<sub>0</sub> energy difference (i.e. the excitation energy) as a function of the simulation progress.

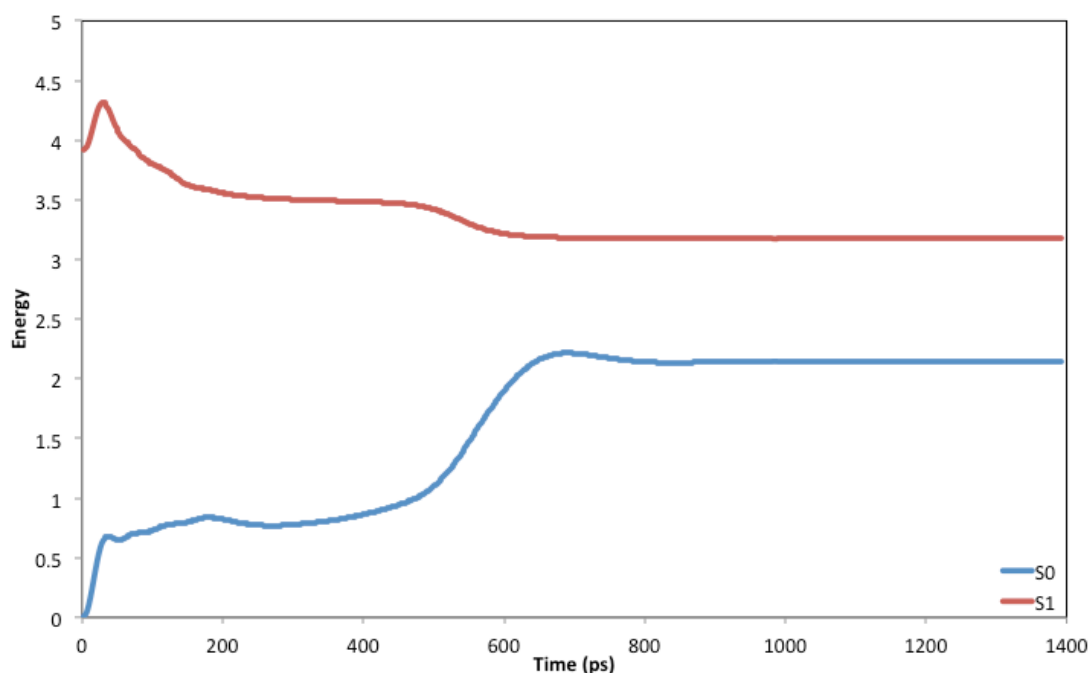

**Fig. S-1** Plot of the  $S_0$  and  $S_1$  energies as a function of the simulation progress for a typical BOMD calculation on  $\text{Zn}_{12}\text{S}_{12}$ ,

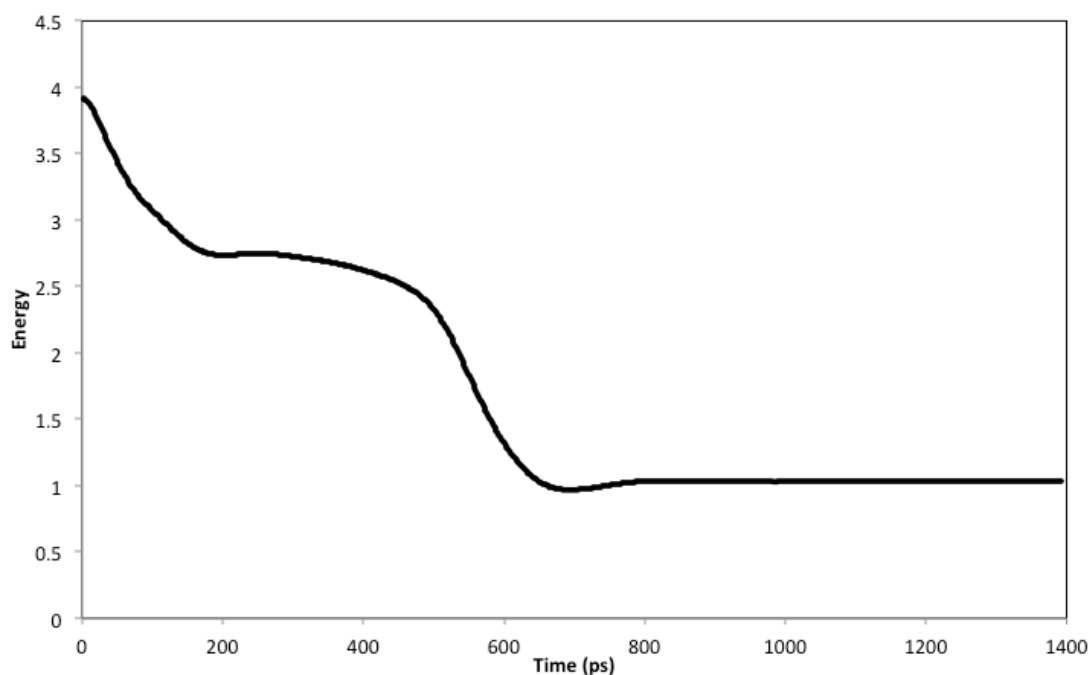

**Fig. S-2** Plot of the  $S_1-S_0$  energy difference (i.e. the excitation energy) as a function of the simulation progress for a typical BOMD calculation on  $\text{Zn}_{12}\text{S}_{12}$ .

#### **ESI-4 Evidence from charge differences for a strongly avoided crossing**

The nature of the barrier between the *N-II* and *I-II* minima was analysed by calculating the  $S_1-S_0$  and  $S_2-S_0$  charge differences along the interpolation pathway that links both minima. Fig. S-2 plots these charge differences for the zinc atom on which an excited electron becomes localised in the *I-II* minimum. One can clearly see that

while the  $S_1$  and  $S_2$  energy surfaces do not cross (see Fig. 4 of the main paper) the characters of both surfaces clearly cross around the top of the barrier.

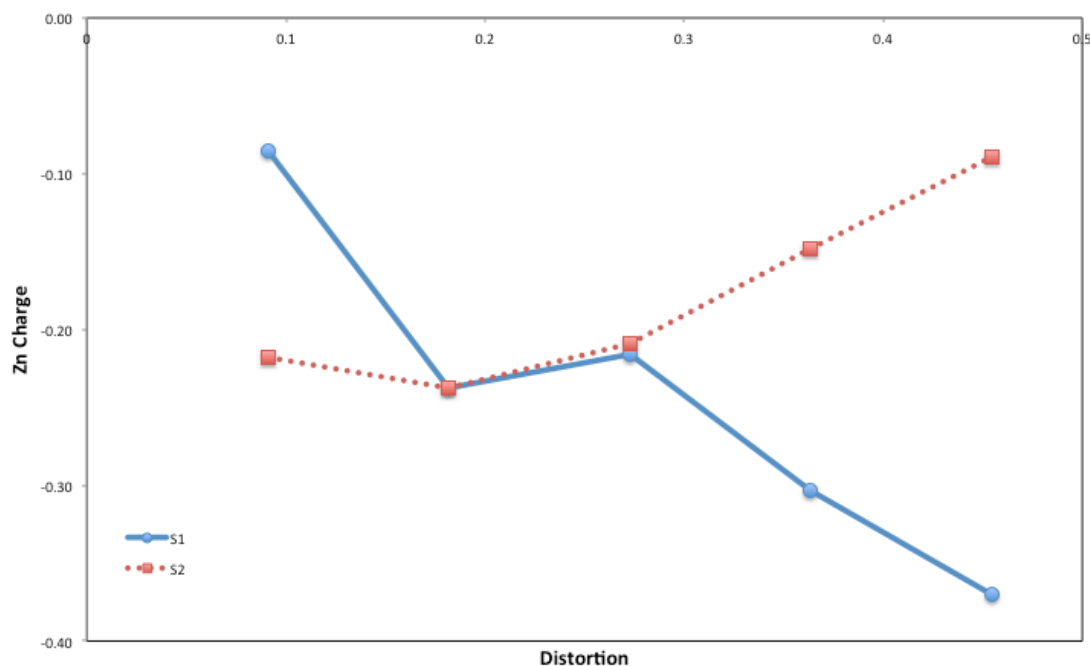

**Fig. S-3** Plot of the difference in ground and excited state charge for the Zn atom on which the electron localises in the *I-II* minimum as a function of the linear distortion that links the  $Zn_{22}S_{22}$  *N-II* and *I-II* minima (states labelled  $S_1$  and  $S_2$  after their ordering at the *N-II* minimum).

**ESI-5 Alternative ground state structure found by DFT optimisation of the  $Zn_{22}S_{22}$  *I-I*  $T_1$  minimum or  $S_1$  CX**

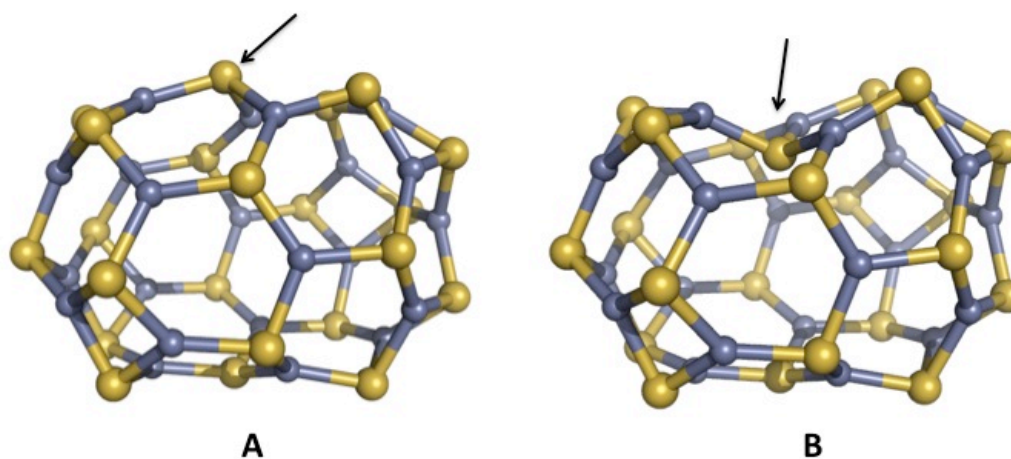

**Fig. S-4** Comparison of the geometries of the  $Zn_{22}S_{22}$  global minimum (A) and the alternative ground state structure obtained by a DFT optimisation starting from the  $Zn_{22}S_{22}$  *I-I*  $T_1$  minimum or  $S_1$  CX (B). An arrow highlights the sulfur atom that is inverted in structure B.

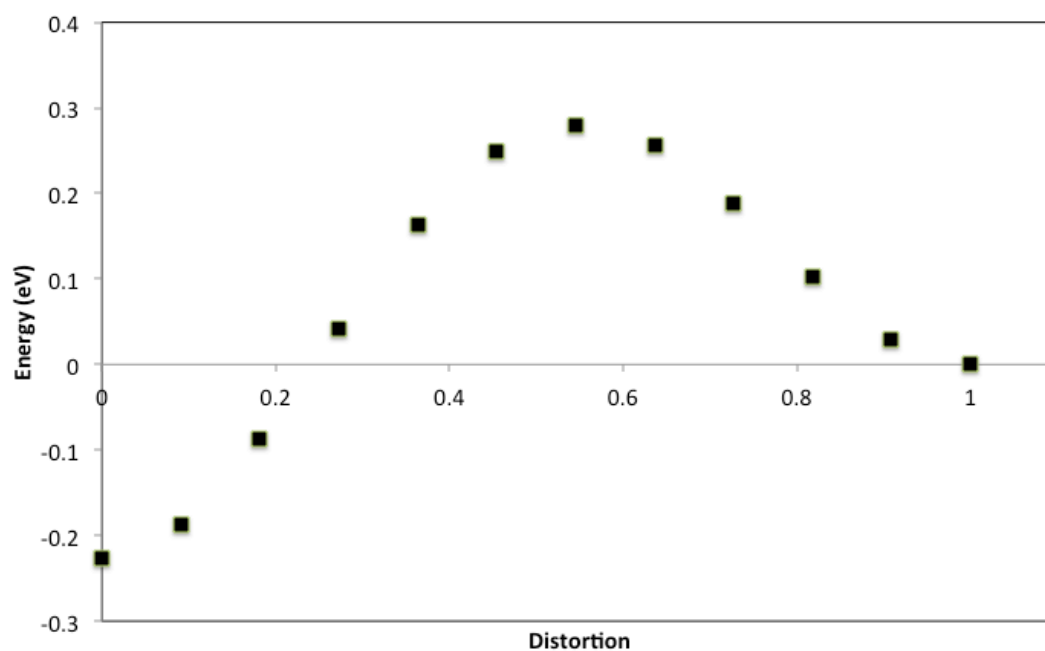

**Fig. S-5** Energy profile along the interpolated path that connects the  $\text{Zn}_{22}\text{S}_{22}$  global minimum (left, 0) and the alternative ground state structure obtained by a DFT optimisation starting from the  $\text{Zn}_{22}\text{S}_{22}$  *I-I*  $T_1$  minimum or  $S_1$  CX (right, 1).

## References

- <sup>1</sup> M.A. Zwijnenburg, *Nanoscale*, 2012, **4**, 3711.
